# Supplementary material for: In situ reconstructed amorphous MOOH-enhanced NiCoP@NiFe-LDH bifunctional electrocatalyst for long durable seawater electrolysis
Source: Royal Society of Chemistry journal article supplement (doi:10.1039/d5qi01709b), 2025-11-12
Supplement: d5qi01709b1.pdf [file d5qi01709b1.pdf]

**In-situ Reconstructed Amorphous MOOH Enhanced NiCoP@NiFe-LDH**

**Bifunctional Electrocatalyst for Long Durable Seawater Electrolysis**

Huiya Zhou<sup>1,2#</sup>, Songlin Xu<sup>1,2#</sup>, Boyao Zhang<sup>1</sup>, Xin Li<sup>1</sup>, Zihan Lv<sup>1</sup>, Depeng

Zhao<sup>1,2\*</sup>, Rong-Da Zhao<sup>1,2\*</sup>

<sup>1</sup>School of New Energy, Shenyang Institute of Engineering, Shenyang, Liaoning,

110136, P. R. China

<sup>2</sup>School of Materials Science and Engineering, Liaoning University of Technology,

Jinzhou, Liaoning 121000, P. R. China

Correspondences should be addressed: [hellodepeng@163.com](mailto:hellodepeng@163.com);

[rongdazhaoln@126.com](mailto:rongdazhaoln@126.com);

## 1. Synthesis of NiCoP@NiFe-LDH Heterojunction Catalyst

1 mmol  $\text{Ni}(\text{NO}_3)_2 \cdot 6\text{H}_2\text{O}$ , 2 mmol  $\text{Co}(\text{NO}_3)_2 \cdot 6\text{H}_2\text{O}$ , 4 mmol  $\text{NH}_4\text{F}$ , and 9 mmol urea in 60 mL DI water under magnetic stirring (1 h, RT). The pretreated Ni foam was vertically immersed in the solution and hydrothermally reacted in a Teflon-lined stainless steel autoclave at  $130^\circ\text{C}$  for 5 h. After cooling to RT, the sample was rinsed three times with anhydrous ethanol and DI water, followed by drying at  $60^\circ\text{C}$  for 6 h to obtain the NiCo precursor-loaded Ni foam. Then, the NiCo precursor-loaded Ni foam was placed in a tube furnace for phosphorization. 0.5 g  $\text{NaH}_2\text{PO}_2$  was positioned upstream in the quartz tube, while the sample was placed downstream. After three vacuum-argon purge cycles, the system was heated to  $350^\circ\text{C}$  for 120 min under high-purity argon. The as-obtained sample was named as NiCoP catalysts. Finally, 0.8 mmol  $\text{Fe}(\text{NO}_3)_3 \cdot 9\text{H}_2\text{O}$ , 3.2 mmol  $\text{Ni}(\text{NO}_3)_2 \cdot 6\text{H}_2\text{O}$ , 16 mmol urea, and 8 mmol  $\text{NH}_4\text{F}$  in 60 mL DI water. The NiCoP sample was transferred into the above solution and hydrothermally reacted at  $120^\circ\text{C}$  for 12 h. Post-reaction, the composite was washed with ethanol and DI water, and then dried at  $60^\circ\text{C}$  for 2h.

## 2. Materials characterization.

The crystal structure and phase composition of the samples were analyzed using an X-ray diffractometer (XRD, D/max-2500/PC) with  $\text{Cu-K}\alpha$  radiation. The XRD measurements were conducted at an accelerating voltage of 100 kV, a tube current of 40 mA, a scanning range from  $0^\circ$  to  $90^\circ$ , and a scanning speed of  $8^\circ$  per minute. Elemental composition and valence states were determined via X-ray photoelectron spectroscopy (XPS, ESCALAB250). The microstructures of the samples were

examined with field emission scanning electron microscopy (SEM, Zeiss-Sigma 500), and the transmission electron microscopy (TEM, JEM2100F) was used to further investigate the microstructure.

### **3. Electrochemical measurements.**

All electrochemical measurements were carried out on a CHI660 electrochemical workstation in 1 M KOH and 1 M KOH + seawater solution. The electrochemical performance and characterization of as-prepared electrodes were tested in a three-electrode system, together with a Hg/HgO electrode as reference electrode and carbon rod as counter electrode. The activity of the electrodes was evaluated by linear sweep voltammetry (LSV) curves with 90% IR compensation. Cyclic voltammetry (CV) curves were recorded at the scan rates of 1 ~ 5 and 10 mV s<sup>-1</sup> to obtain the double-layer capacitance values. Electrochemical impedance spectroscopy (EIS) was measured from 0.1 Hz to 1000 kHz. The stability of the electrode was studied in a constant potential of -0.1 V vs. RHE. All the potentials were converted to RHE by Nernst equation ( $E_{\text{RHE}} = E_{\text{Hg/HgO}} + 0.0591\text{pH} + 0.098$ ). the values of 1 M KOH and 1 M KOH + seawater are 13.6 and 13.51, respectively.

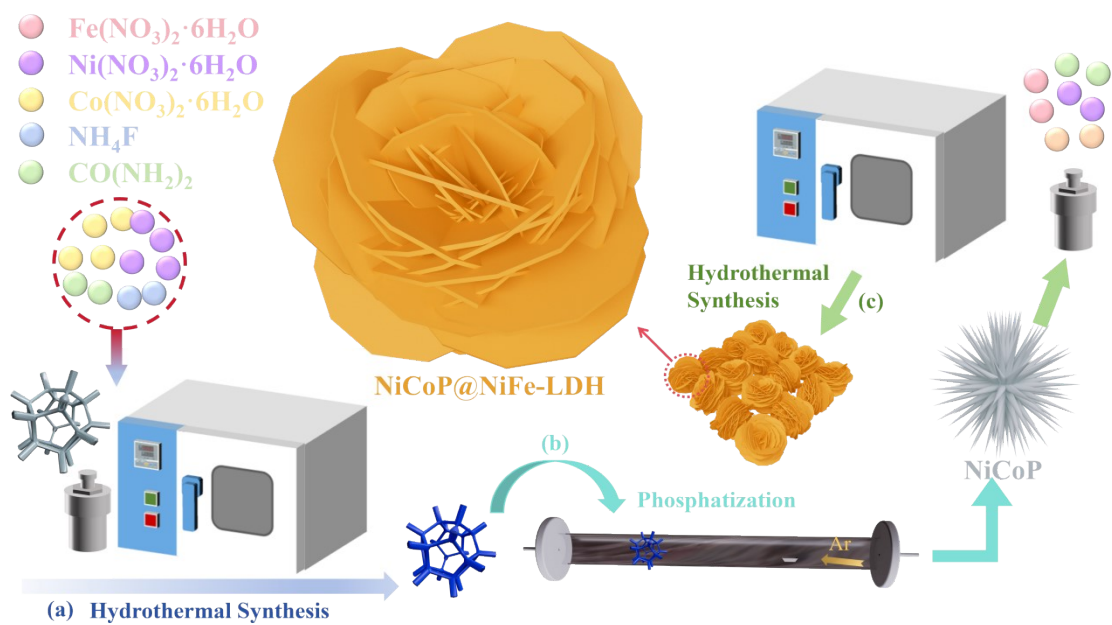

**Fig. S1** (a-c) Schematic illustration of the synthesis process for NiCoP@NiFe-LDH samples

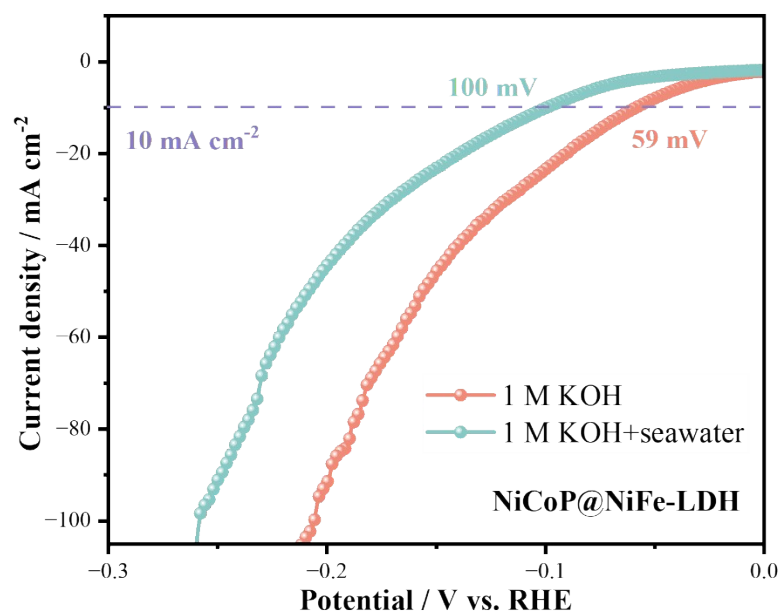

**Fig. S2** HER Polarization curves of NiCoP@NiFe-LDH in different electrolytes.

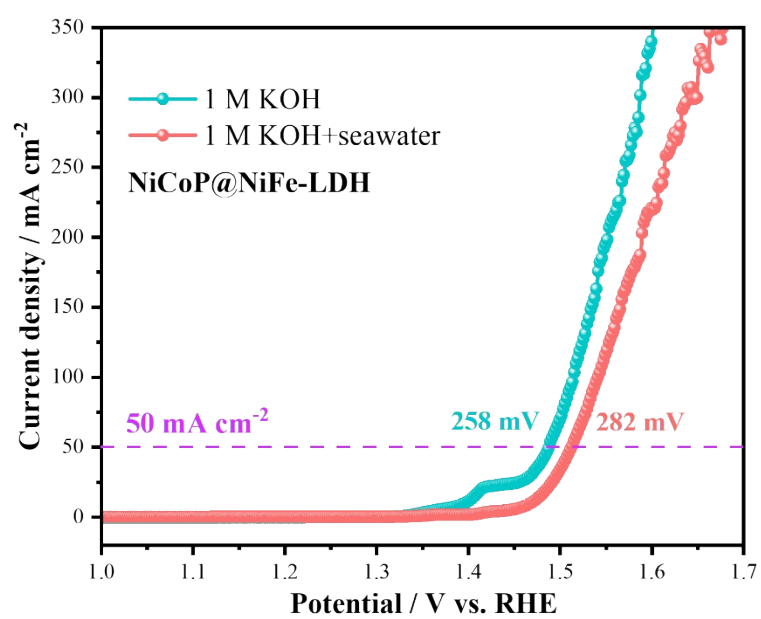

**Fig. S3** OER Polarization curves of NiCoP@NiFe-LDH in different electrolytes.

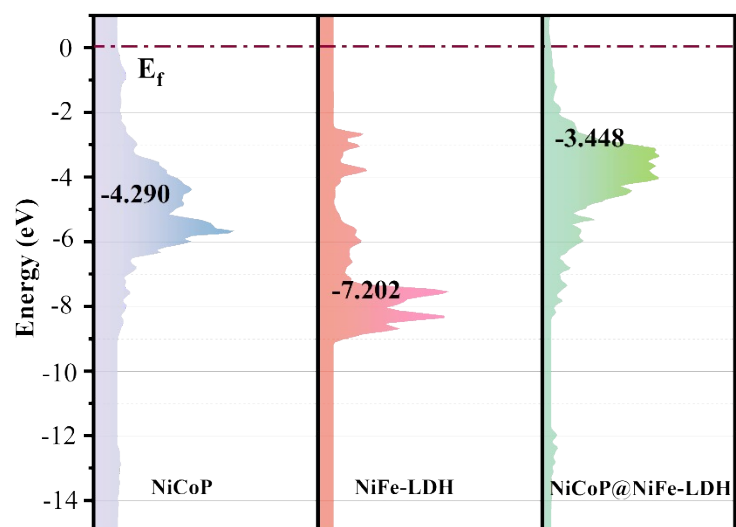

**Fig. S4** The value of d band center of the three structures.

Table 1 Electrocatalytic performance of the samples

| Catalysts                               | Overpotential | Tafel (mV dec <sup>-1</sup> ) | Electrolyte | Ref.      |
|-----------------------------------------|---------------|-------------------------------|-------------|-----------|
| NiFe-LDH/Ti <sub>3</sub> C <sub>2</sub> | OER:334 mV@10 | 55                            | 1.0 M KOH   | 1         |
| Ni-BDC@NiFe-LDH-2                       | OER:272 mV@10 | 45                            | 1.0 M KOH   | 2         |
| 2.5Fe-NiCoP/PBA HNCs                    | OER:290 mV@10 | 70                            | 1.0 M KOH   | 3         |
| NiCoP-1.0                               | HER:84 mV@10  | 75.74                         | 1.0 M KOH   | 4         |
| CoFeP/CoP-400                           | HER:78 mV@10  | 55.5                          | 1.0 M KOH   | 5         |
| NiFe-LDH/MoS <sub>2</sub> /CFP          | HER:88.5mV@10 | 63.4                          | 1.0 M KOH   | 6         |
| NiFe-LDH/FeCoS <sub>2</sub> /CFC        | HER:308mV@10  | 157                           | 1.0 M KOH   | 7         |
| NiCoP@NiFe-LDH                          | HER:59mV@10   | 34.4                          | 1.0 M KOH   | This work |
|                                         | OER:258mV@50  | 20.02                         |             |           |
|                                         | HER:100mV@10  | 41.07                         | 1.0 M KOH + |           |
|                                         | OER:285mV@50  | 25.19                         | seawater    |           |

1. Y. Sun, Z. Wang, Q. Zhou, X. Li, D. Zhao, B. Ding and S. Wang, Ti<sub>3</sub>C<sub>2</sub> mediates the NiFe-LDH layered electrocatalyst to enhance the OER performance for water splitting, *Heliyon*, 2024, **10**.
2. Q. Dong, C. Shuai, Z. Mo, R. Guo, N. Liu, G. Liu, J. Wang, W. Liu, Y. Chen, J. Liu, Y. Jiang and Q. Gao, The in situ derivation of a NiFe-LDH ultra-thin layer on Ni-BDC nanosheets as a boosted electrocatalyst for the oxygen evolution reaction, *CrystEngComm*, 2021, **23**, 1172-1180.
3. D. Li, C. Liu, W. Ma, S. Xu, Y. Lu, W. Wei, J. Zhu and D. Jiang, Fe-doped NiCoP/Prussian blue analog hollow nanocubes as an efficient electrocatalyst for oxygen evolution reaction, *Electrochimica Acta*, 2021, **367**, 137492.
4. D. Wang, A. Umar and X. Wu, Enhanced water electrolysis performance of bifunctional NiCoP electrocatalyst in alkaline media, *Journal of Electroanalytical Chemistry*, 2023, **950**, 117888.
5. L. Tan, R. He, A. Shi, L. Xue, Y. Wang, H. Li and X. Song, Heterostructured CoFeP/CoP as an Electrocatalyst for Hydrogen Evolution in Alkaline Media, *Inorganic Chemistry*, 2023, **62**, 9964-9970.
6. N. Cao, Y. Di, S. Chen, X. Jin, M. Liu, Q. Shao and X. Zang, Hierarchical nanoarchitecture with NiFe-LDH on MoS<sub>2</sub> for enhanced electrocatalysis of hydrogen evolution in alkaline media, *Electrochimica Acta*, 2023, **467**, 143079.
7. Z. Zhang, J. Zhou, H. Wei, Y. Dai, S. Li, H. Shi and G. Xu, Construction of hierarchical NiFe-LDH/FeCoS<sub>2</sub>/CFC composites as efficient bifunctional electrocatalysts for hydrogen and oxygen evolution reaction, *Journal of Materials Science*, 2020, **55**, 16625-16640.
